# Supplementary material for: How Cooking Time Affects In Vitro Starch and Protein Digestibility of Whole Cooked Lentil Seeds versus Isolated Cotyledon Cells
Source: MDPI journal article supplement (doi:10.3390/foods12030525), 2023-01-24
Supplement: s1 [file s1]

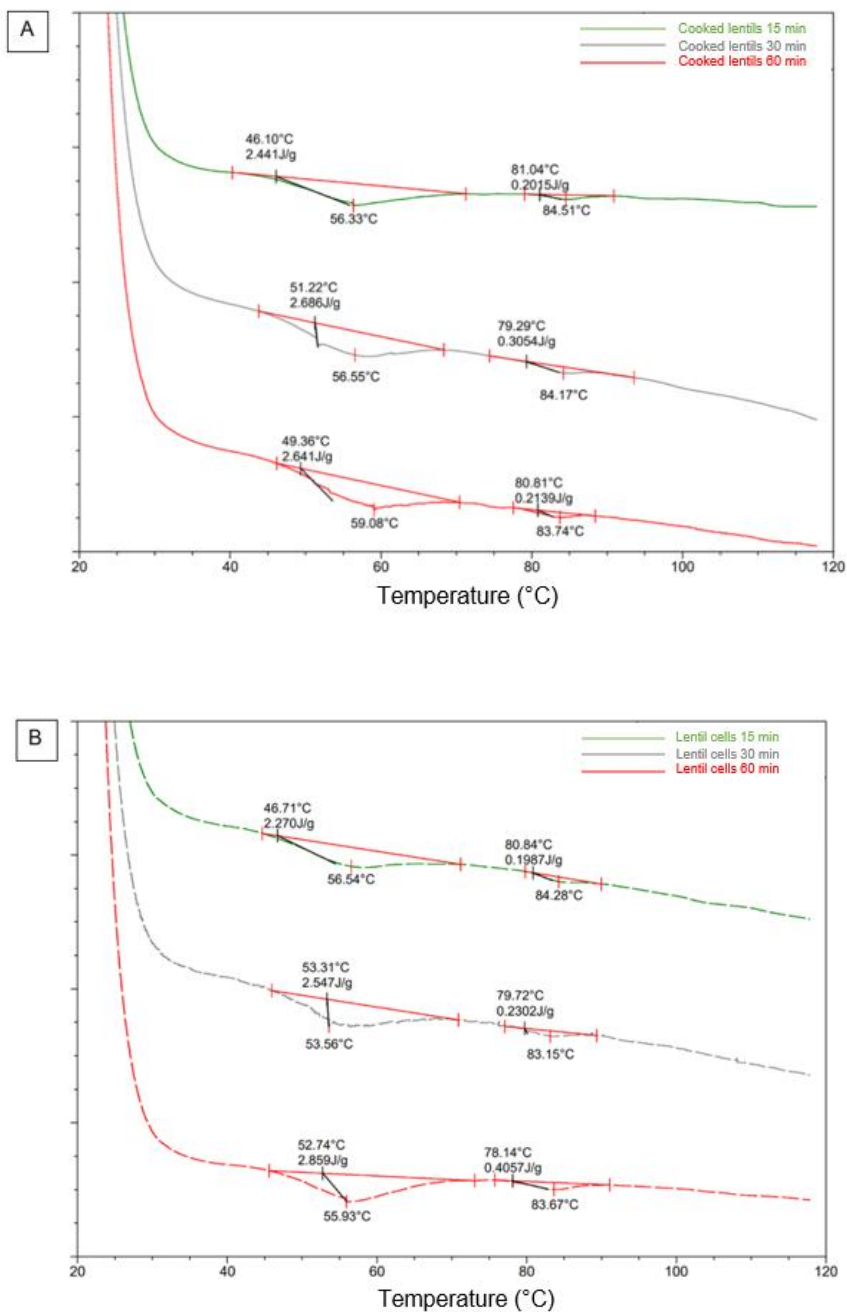

**Figure S1:** DSC thermograms obtained for (A) lentils cooked for 15, or 60 minutes, and (B) lentil cells isolated from lentils cooked for 15, 30, or 60 minutes. These thermograms indicate complete gelatinization of starch due to the absence of a peak around 68–69 °C, with the peak around 55 °C representing gelatinization of retrograded starch. The peak around 83 °C is probably due to the formation of amylose-lipid complexes and/or residual protein denaturation.
