# Supplementary material for: How Cooking Time Affects In Vitro Starch and Protein Digestibility of Whole Cooked Lentil Seeds versus Isolated Cotyledon Cells
Source: MDPI journal article supplement (doi:10.3390/foods12030525), 2023-01-24
Supplement: s1 [file s1]

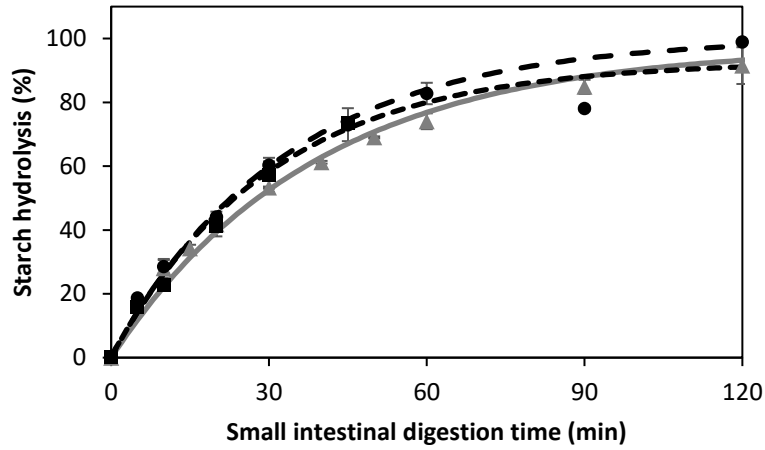

**Figure S2:** Reproducibility of the experimental set-up used in this work evaluated for *in vitro* amylolysis as a function of small intestinal digestion time of whole cooked lentils cooked for 30 minutes (▲) as used in this work (see Figure 3 (a)). (●) and (■) represent evaluations of lentils of the same batch, independently cooked, mechanically disintegrated, and *in vitro* digested in duplicate using separately characterized enzyme batches. Symbols represent experimental data. Lines represent the data modelled using the fractional conversion model (Eq. 3). For the three independent evaluations, the estimated model parameters are not significantly different ( $p < 0.05$ ). Error bars indicate the standard deviation of analytical replicates.
