# Supplementary material for: How Cooking Time Affects In Vitro Starch and Protein Digestibility of Whole Cooked Lentil Seeds versus Isolated Cotyledon Cells
Source: MDPI journal article supplement (doi:10.3390/foods12030525), 2023-01-24
Supplement: s1 [file s1]

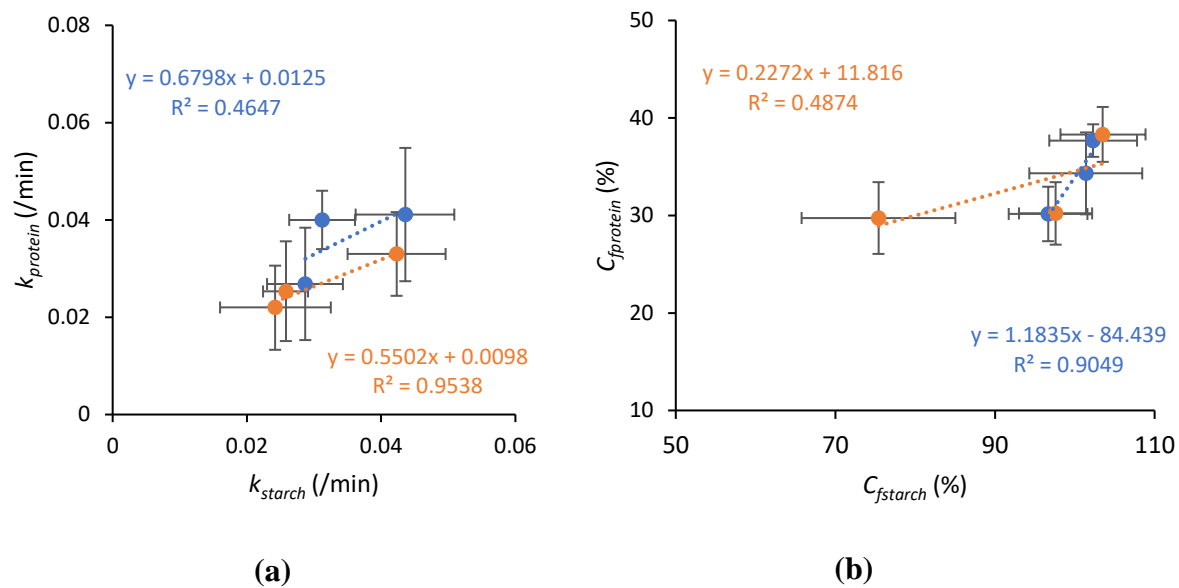

**Figure S4:** Correlation between estimated model parameters for amylolysis and proteolysis of (●) whole cooked lentil seeds (CL) and (●) isolated cotyledon cells (ICC) during small intestinal digestion: **(a)** reaction rate constant  $k$  (/min), and **(b)** final extent of hydrolysis  $C_f$  (%). Error bars indicate 95% confidence intervals of the estimated parameters.
